# Supplementary material for: Enhanced photodegradation of decabromodiphenyl ether on oxygen vacancy-enriched Bi2MoO6
Source: Royal Society of Chemistry journal article supplement (doi:10.1039/d2ra01762h), 2022-01-01
Supplement: d2ra01762h1.pdf [file d2ra01762h1.pdf]

## Supplementary Information

### Enhanced photodegradation of decabromodiphenyl ether on oxygen vacancies enriched $\text{Bi}_2\text{MoO}_6$

*Qin Li<sup>b</sup>, Xueqing Jin<sup>a</sup>, Meiyang Yang<sup>a</sup>, Qi Shen<sup>a,c,\*</sup>, Chunyan Sun<sup>a,\*</sup>*

<sup>a</sup> School of Chemistry and Chemical Engineering, Shaoxing University, Zhejiang Shaoxing 312000, China

<sup>b</sup> Beijing GeoEnviron Engineering & Technology, Inc, Beijing 100000, China

<sup>c</sup> Institute of New Energy, School of Chemistry and Chemical Engineering, Shaoxing University, Shaoxing 312000, China

\*Correspondence: E-mail: shenqi@usx.edu.cn; sunchunyan@usx.edu.cn; Tel/Fax: 86 0575 8834-1521

## Table of content

**Figure S1.** The structure of BDE209

**Table S1.** The specific surface areas of BMO-x (x=0, 3, 5, 7, 9)

**Figure S2.** XRD patterns of the resulting samples after illumination ( $\lambda > 420$  nm)

**Figure S3.** XPS spectra of BMO-0, BMO-5 and BMO-9 (a) Full-range spectrum, (b) Mo 3d, (c) Bi 4f

**Figure S4** The colors change of the BMO-x (x=0, 3, 5, 7, 9) before (a) and after (b) illumination

**Figure S5** The chronoamperometric i-t curves of BMO-x (x=0, 3, 5, 7, 9) photoelectrodes were recorded at -0.4 V vs saturated calomel electrode (SCE) under chopped light irradiation

**Figure S6** Effects of light and photoelectron scavengers ( $O_2$ ,  $H_2O_2$  and 1,4-benzoquinone) on the degradation of BDE209 over BMO-5

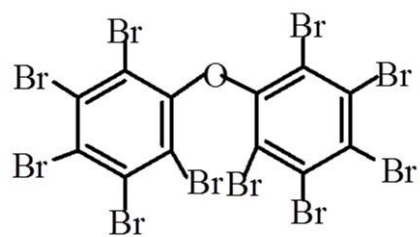

**Figure S1** The structure of BDE209

Table S1 The specific surface areas of BMO-x (x=0, 3, 5, 7, 9)

| Samples | $S_{BET} (m^2/g)$ | $S_{Langmuir} (m^2/g)$ |
|---------|-------------------|------------------------|
| BMO-0   | 53.4769           | 73.6617                |
| BMO-3   | 33.2596           | 45.8099                |
| BMO-5   | 35.1345           | 48.4803                |
| BMO-7   | 48.6911           | 67.9136                |
| BMO-9   | 52.2120           | 72.3736                |

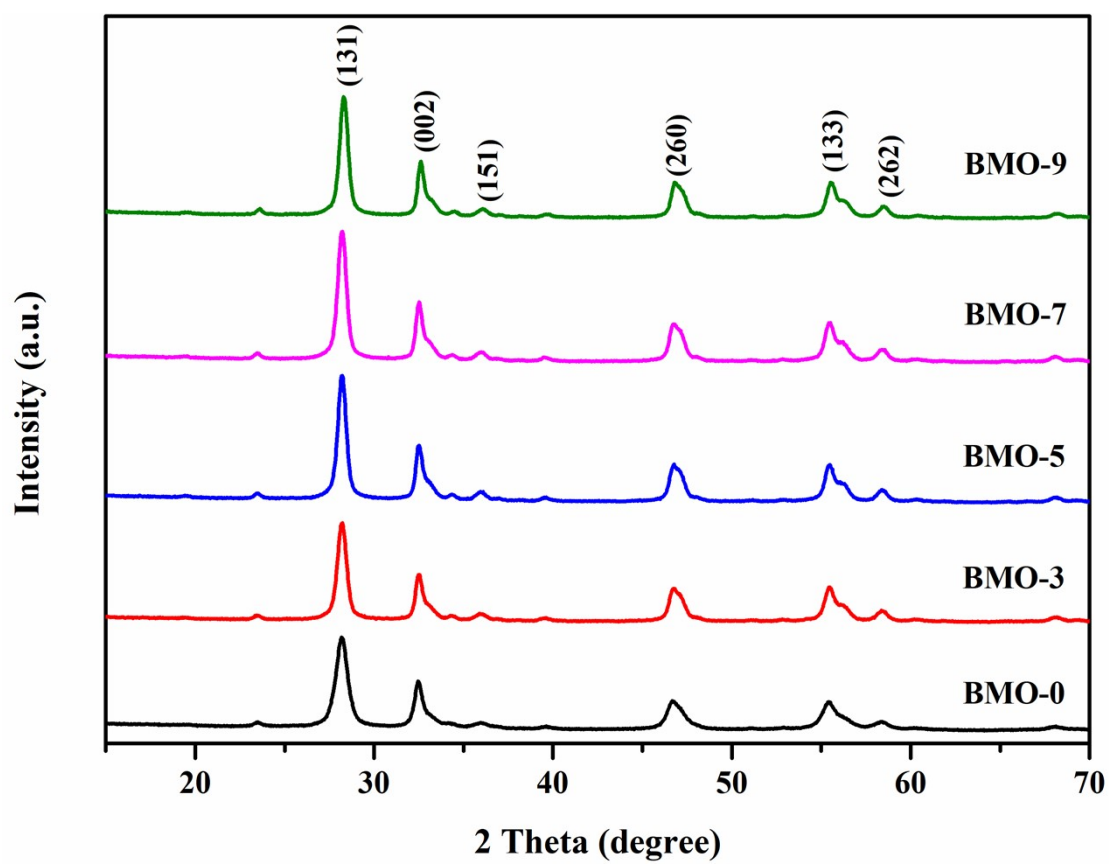

Figure S2 XRD patterns of the resulting samples after illumination ( $\lambda > 420$  nm)

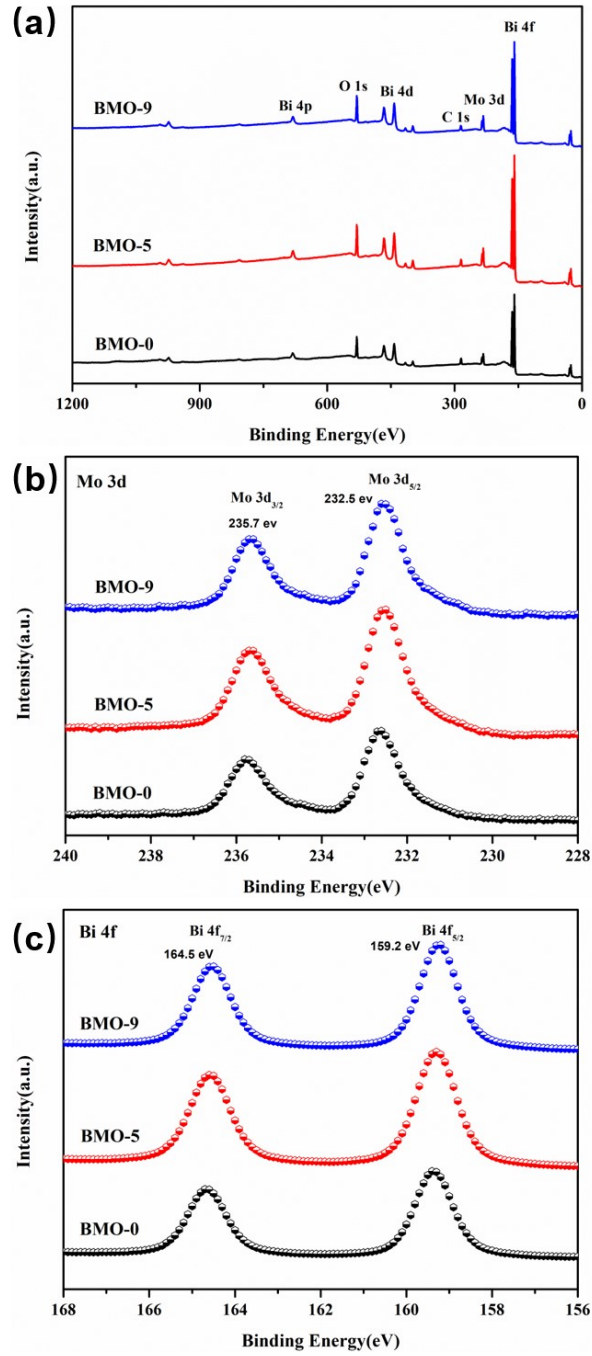

**Figure S3.** XPS spectra of BMO-0, BMO-5 and BMO-9 (a) Full-range spectrum, (b) Mo 3d, (c) Bi 4f

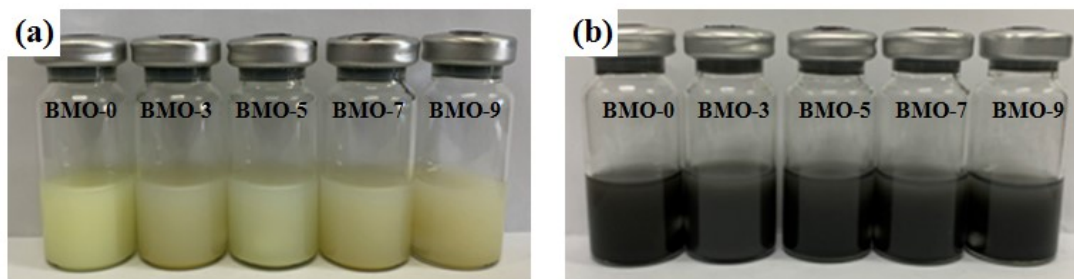

Figure S4 The colors change of the BMO- $x$  ( $x=0, 3, 5, 7, 9$ ) before (a) and after (b) illumination

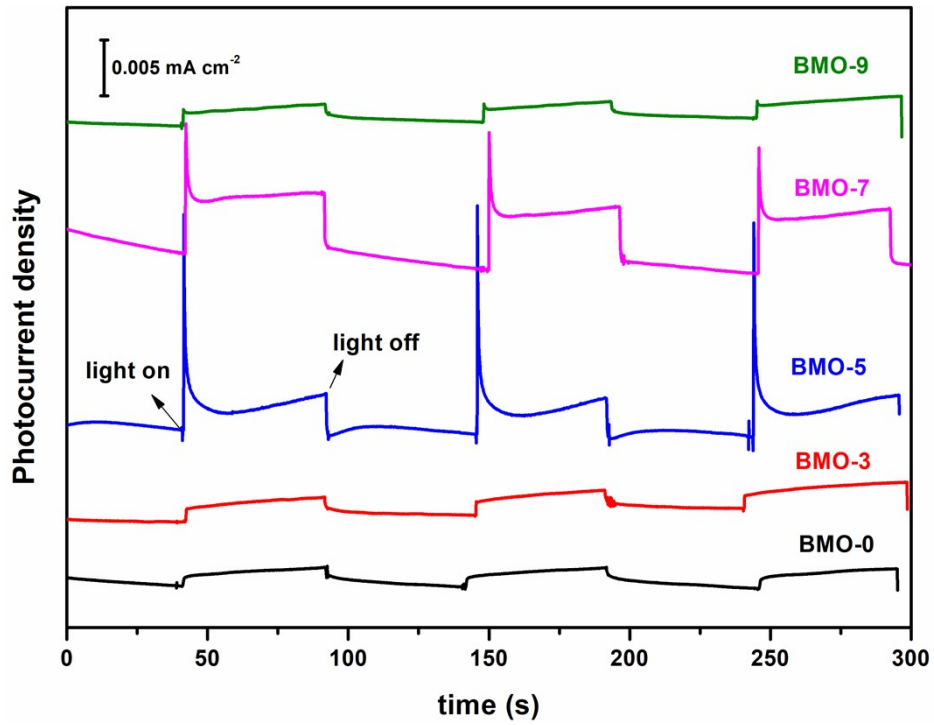

Figure S5 The chronoamperometric *i-t* curves of BMO-*x* (*x*=0, 3, 5, 7, 9) photoelectrodes were recorded at -0.4 V vs saturated calomel electrode (SCE) under chopped light irradiation



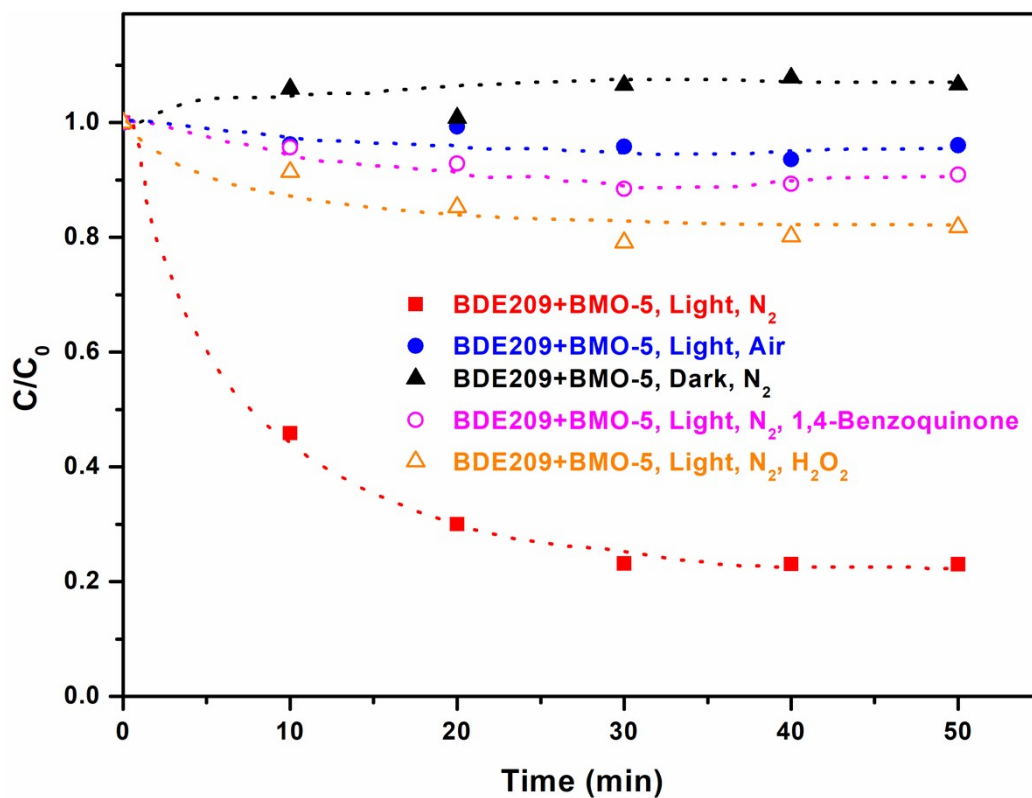

Figure S6 Effects of light and photoelectron scavengers ( $O_2$ ,  $H_2O_2$  and 1,4-benzoquinone) on the degradation of BDE209 over BMO-5
